# Supplementary material for: Accelerating simulations using REDCHEM_v0.0 for atmospheric chemistry mechanism reduction
Source: Copernicus journal article supplement (doi:10.5194/gmd-11-3391-2018), 2018-08-21
Supplement: Supplementary file 1 [file gmd-11-3391-2018-supplement.zip]

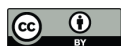

## *Supplement of*

# **Accelerating simulations using REDCHEM\_v0.0 for atmospheric chemistry mechanism reduction**

**Zacharias Marinou Nikolaou et al.**

*Correspondence to:* Zacharias Marinou Nikolaou (zacharias.nicolaou@cyi.ac.cy)

- gmd-11-3391-2018-supplement-title-page.pdf
- REDCHEM\_v0.0\_
  - Global.f90
  - LICENSE
    - \* gnu-gpl\_v3.txt
  - Makefile
  - README.txt
  - char\_util.f90
  - drg.f90
  - goredchem
  - goredchem.sh
  - graph\_search\_mod.f90
  - input
    - \* REACTIONS.eqn
    - \* SPECIES.spc
    - \* rates
    - \* target.txt
  - main\_redchem.f90
  - output.f90
  - parsechem.f90
  - prec.f90
  - read\_rates.f90
  - sort.f90
  - timing.f90

The copyright of individual parts of the supplement might differ from the CC BY 4.0 License.
